# Supplementary material for: Solar light assisted green synthesis of palladium nanoparticle decorated nitrogen doped graphene for hydrogen storage application
Source: Royal Society of Chemistry journal article supplement (doi:10.1039/c3ta12016c), 2013-01-01
Supplement: c3ta12016c.pdf [file c3ta12016c.pdf]

## Supporting Information

# Solar light assisted green synthesis of palladium nanoparticle decorated nitrogen doped graphene for hydrogen storage application

*B. P. Vinayan,<sup>a</sup> Rupali Nagar,<sup>b</sup> and S. Ramaprabhu\*<sup>a</sup>*

<sup>a</sup> Alternative Energy and Nanotechnology Laboratory (AENL), Nano Functional Materials Technology Centre (NFMTC), Department of Physics, Indian Institute of Technology Madras, Chennai, Tamil Nadu, 600036, India.

Phone: +91-44-22574862, Fax: +91- 44 - 22570509/22574852

\*Email: ramp@iitm.ac.in

<sup>b</sup> Applied Science, Symbiosis Institute of Technology (SIT)  
SIU Lavale, Pune, 412 115, India

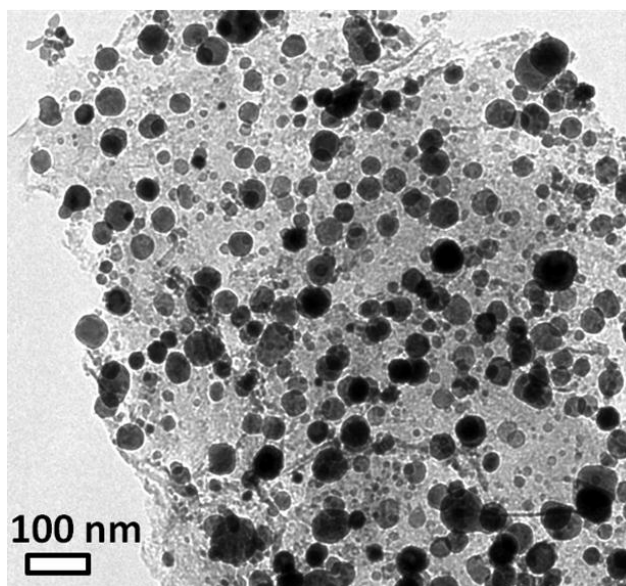

**Figure S1:** TEM image of Pd/SG sample

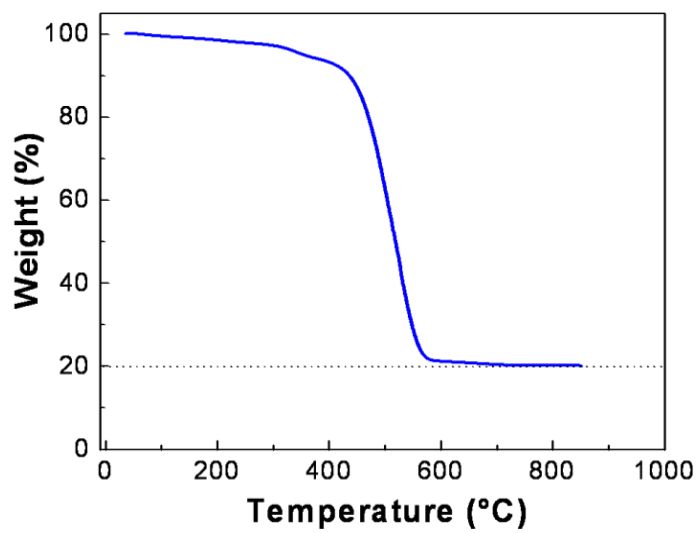

**Figure S2:** TGA image of Pd/N-SG sample

**Table S1:** Hydrogen storage capacity of different carbon nanomaterials decorated with Pd metal

| <b>Material</b>                           | <b>Pd metal loading (%)</b> | <b>Temperature and Pressure</b> | <b>Hydrogen storage capacity (wt. %)</b> | <b>Reference</b> |
|-------------------------------------------|-----------------------------|---------------------------------|------------------------------------------|------------------|
| Pd bulk                                   | -                           | 23 °C , 0.1 MPa                 | 0.56                                     | [1]              |
| Pd nanoparticles (~7 nm)                  | -                           | 25 °C, 2 MPa                    | 0.72                                     | [2]              |
| Pd/Super activated carbon                 | 10                          | 25 °C, 10 MPa                   | 1.15                                     | [3]              |
| Pd/Activated carbon                       | 49                          | 23 °C, 9 MPa                    | 0.70                                     | [1]              |
| Pd/SWNT                                   | 31                          | 23 °C, 9 MPa                    | 0.5                                      | [1]              |
| Pd/MWNT                                   | 20                          | 25 °C, 2.2 MPa                  | 0.35                                     | [4]              |
| Pd/Nitrogen doped graphite nanoplatelets  | 10                          | 25 °C, 3.2 MPa                  | 1.25                                     | [5]              |
| Pd/Acid functionalized few layer graphene | 20                          | 25 °C, 2 MPa                    | 1.76                                     | [6]              |
| Pd/Graphite oxide                         | 10                          | 25 °C, 10 MPa                   | 0.95                                     | [3]              |
| Pd/Nitrogen doped few layer graphene      | 30                          | 25 °C, 4 MPa                    | 2.3                                      | [2]              |

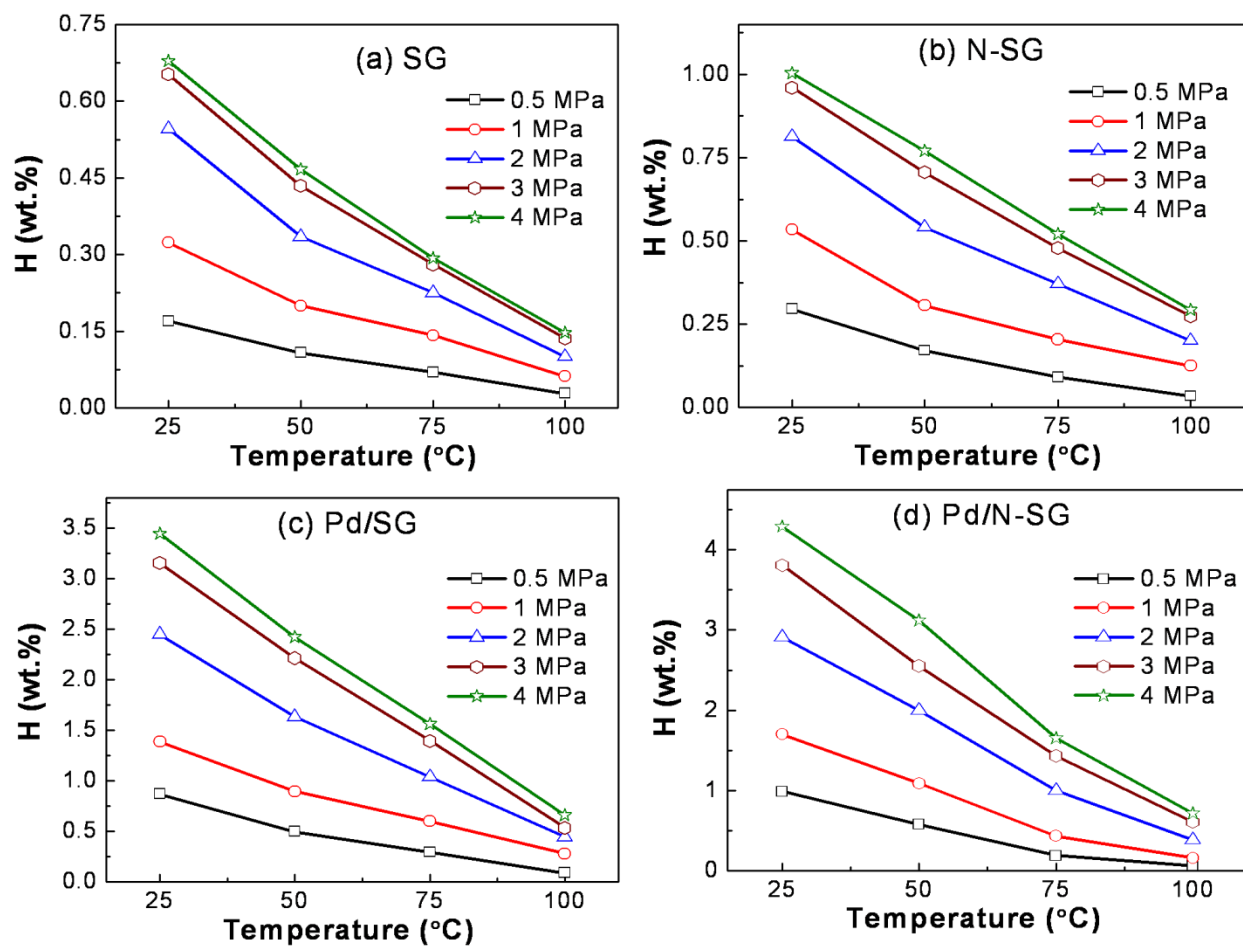

**Figure S3:** Temperature variations of hydrogen storage capacity for the samples SG, N-SG, Pd/SG and Pd/N-SG at different pressures.

## References

1. A. Ansón, E. Lafuente, E. Urriolabeitia, R. Navarro, A. M. Benito, W. K. Maser and M. T. Martínez, *J. Phys. Chem. B*, 2006, **110**, 6643-6648.
2. B. P. Vinayan, K. Sethupathi and S. Ramaprabhu, *Int. J. Hydrogen Energy*, 2013, **38**, 2240-2250.
3. L. Wang, F. H. Yang, R. T. Yang and M. A. Miller, *Ind. Eng. Chem. Res.* 2009, **48**, 2920-2926.
4. S.-u. Rather, R. Zacharia, S. W. Hwang, M.-u.-d. Naik and K. S. Nahm, *Chem. Phys. Lett.*, 2007, **441**, 261-267.
5. B. P. Vinayan, K. Sethupathi and S. Ramaprabhu, *J. Nanosci. Nanotechnol.*, 2012, **12**, 6608-6614.
6. B. P. Vinayan, R. Nagar, K. Sethupathi and S. Ramaprabhu, *J. Phys. Chem. C*, 2011, **115**, 15679-15685.
7. V. Bérubé, G. Radtke, M. Dresselhaus and G. Chen, *Int. J. Energy Res.*, 2007, **31**, 637-663.
8. P. Chou and M. A. Vannice, *J. Catal.*, 1987, **104**, 17-30.
